# Supplementary material for: SSCMDA: spy and super cluster strategy for MiRNA-disease association prediction
Source: PubMed Central journal article supplement (PMC5788602; doi:10.18632/oncotarget.22812), 2017-12-01
Supplement: oncotarget-09-1826-s001.pdf [file oncotarget-09-1826-s001.pdf]

## **SSCMDA: spy and super cluster strategy for MiRNA-disease association prediction**

### **SUPPLEMENTARY MATERIALS**

**Supplementary Table 1: We applied SSCMDA to prioritize all the candidate miRNA-disease pairs based on all the known miRNA-disease associations in HMDD database as training samples. See Supplementary\_Table\_1**
